# Supplementary material
Source: MDPI journal article supplement (https://www.mdpi.com/2073-4433/15/3/314)
Supplement: s1 [file s1]

# Hydroclimate Changes Based on Testate Amoebae in the Greater Khingan Mountains' Peatland (NE China) during the Last Millennium

Xiao Li, Dongxue Han, Jinxin Cong, Chuanyu Gao and Guoping Wang

**Table S1.** 60 samples from the HT profile.

| Genus               | Species                    | 1      | 2      | 3      | 4      | 5      | 6      | 7      | 8      | 9      | 10     |
|---------------------|----------------------------|--------|--------|--------|--------|--------|--------|--------|--------|--------|--------|
| <i>Arcella</i>      | <i>A.catinus</i>           | 0.00%  | 0.00%  | 0.77%  | 1.40%  | 0.00%  | 0.00%  | 1.23%  | 3.97%  | 1.16%  | 2.89%  |
|                     | <i>A.vulgaris</i>          | 0.00%  | 0.00%  | 0.00%  | 0.00%  | 0.00%  | 0.00%  | 0.00%  | 0.00%  | 0.58%  | 0.00%  |
| <i>Archerella</i>   | <i>A.flavum</i>            | 0.00%  | 0.00%  | 0.77%  | 0.00%  | 0.00%  | 0.00%  | 0.00%  | 0.00%  | 0.00%  | 0.00%  |
| <i>Argygnia</i>     | <i>A.dentistoma</i>        | 0.00%  | 0.00%  | 0.00%  | 0.00%  | 0.00%  | 0.00%  | 0.00%  | 0.00%  | 0.00%  | 0.00%  |
| <i>Assulina</i>     | <i>A.muscorum</i>          | 38.42% | 11.17% | 13.08% | 9.09%  | 2.87%  | 5.92%  | 15.43% | 6.62%  | 7.56%  | 21.97% |
|                     | <i>A.seminulum</i>         | 0.56%  | 0.00%  | 0.77%  | 0.00%  | 3.45%  | 1.78%  | 1.85%  | 1.99%  | 4.07%  | 2.89%  |
| <i>Alabasta</i>     | <i>A.militaris</i>         | 2.26%  | 31.38% | 3.08%  | 20.28% | 40.80% | 15.98% | 21.60% | 19.87% | 18.60% | 12.72% |
| <i>Centropyxis</i>  | <i>C.aculeata type</i>     | 0.00%  | 0.00%  | 1.54%  | 0.70%  | 0.00%  | 0.00%  | 0.62%  | 0.00%  | 0.00%  | 0.58%  |
|                     | <i>C.aerophilatype</i>     | 10.17% | 1.60%  | 25.38% | 6.29%  | 3.45%  | 2.96%  | 1.85%  | 7.95%  | 1.74%  | 1.73%  |
|                     | <i>C.platystomatype</i>    | 18.64% | 0.00%  | 0.00%  | 0.00%  | 0.00%  | 0.00%  | 0.00%  | 0.00%  | 0.00%  | 0.00%  |
| <i>Cyclopyxis</i>   | <i>C.arcelloides</i>       | 0.00%  | 0.53%  | 1.54%  | 3.50%  | 0.00%  | 0.00%  | 0.62%  | 0.00%  | 1.74%  | 0.00%  |
|                     | <i>C.Kahli</i>             | 0.00%  | 0.53%  | 0.00%  | 0.00%  | 0.00%  | 0.00%  | 0.00%  | 0.00%  | 0.00%  | 0.00%  |
| <i>Corythion</i>    | <i>C.dubium</i>            | 0.56%  | 5.85%  | 7.69%  | 4.90%  | 0.57%  | 0.59%  | 0.00%  | 0.00%  | 4.07%  | 0.00%  |
| <i>Diffugia</i>     | <i>D.acuminata type</i>    | 0.00%  | 0.00%  | 0.00%  | 0.00%  | 0.00%  | 0.00%  | 0.00%  | 0.00%  | 0.00%  | 0.00%  |
|                     | <i>D.lucida</i>            | 0.00%  | 0.00%  | 0.00%  | 1.40%  | 0.00%  | 0.00%  | 7.41%  | 5.30%  | 8.14%  | 4.62%  |
|                     | <i>D.type A</i>            | 0.00%  | 0.00%  | 0.00%  | 0.70%  | 0.00%  | 0.00%  | 0.00%  | 0.00%  | 0.00%  | 0.00%  |
| <i>Euglypha</i>     | <i>E.cristata</i>          | 0.00%  | 0.00%  | 0.00%  | 0.00%  | 0.00%  | 0.00%  | 0.62%  | 0.00%  | 0.00%  | 0.00%  |
|                     | <i>E.rotunda</i>           | 20.34% | 17.55% | 3.85%  | 6.29%  | 4.02%  | 3.55%  | 2.47%  | 2.65%  | 4.07%  | 5.78%  |
|                     | <i>E.strigosa</i>          | 0.00%  | 0.00%  | 0.00%  | 0.00%  | 0.00%  | 0.00%  | 0.00%  | 1.99%  | 0.00%  | 0.00%  |
|                     | <i>E.tuberculata</i>       | 2.26%  | 0.53%  | 4.62%  | 0.70%  | 2.87%  | 4.73%  | 4.32%  | 0.00%  | 2.33%  | 4.05%  |
|                     | <i>E.dentata</i>           | 1.13%  | 1.60%  | 0.00%  | 0.00%  | 0.00%  | 0.00%  | 0.00%  | 0.00%  | 0.00%  | 0.00%  |
|                     | <i>H.petricola/sphagni</i> | 0.00%  | 1.06%  | 0.77%  | 1.40%  | 4.60%  | 5.92%  | 0.62%  | 0.00%  | 0.58%  | 2.89%  |
| <i>Heleopera</i>    | <i>H.rosea</i>             | 0.00%  | 0.00%  | 1.54%  | 0.70%  | 1.15%  | 0.59%  | 0.62%  | 1.99%  | 0.00%  | 0.58%  |
|                     | <i>H.sylvatica</i>         | 0.56%  | 0.00%  | 0.00%  | 0.00%  | 0.00%  | 0.00%  | 0.00%  | 0.00%  | 0.00%  | 0.00%  |
|                     | <i>H.elegans</i>           | 0.00%  | 0.00%  | 0.00%  | 3.50%  | 1.15%  | 17.75% | 6.79%  | 4.64%  | 11.63% | 3.47%  |
| <i>Hyalosphenia</i> | <i>H.minuta</i>            | 0.00%  | 0.00%  | 0.00%  | 0.70%  | 0.00%  | 0.00%  | 0.62%  | 0.66%  | 0.00%  | 0.00%  |
|                     | <i>H.papilio</i>           | 0.00%  | 0.00%  | 6.15%  | 1.40%  | 0.00%  | 1.18%  | 6.79%  | 5.96%  | 4.07%  | 6.36%  |
|                     | <i>H.spp</i>               | 0.00%  | 0.00%  | 3.85%  | 0.00%  | 0.00%  | 0.00%  | 0.00%  | 0.00%  | 0.00%  | 0.00%  |
|                     | <i>N.collaris</i>          | 0.00%  | 0.00%  | 1.54%  | 0.00%  | 0.00%  | 0.00%  | 0.62%  | 0.00%  | 0.00%  | 0.00%  |
| <i>Nebela</i>       | <i>N.lageniformis</i>      | 0.00%  | 0.00%  | 2.31%  | 0.00%  | 0.00%  | 0.00%  | 0.00%  | 1.99%  | 0.00%  | 0.00%  |
|                     | <i>N.penardiana</i>        | 0.00%  | 0.00%  | 0.00%  | 2.10%  | 0.00%  | 0.59%  | 0.62%  | 0.00%  | 0.00%  | 0.00%  |
|                     | <i>N.tincta</i>            | 0.56%  | 5.85%  | 7.69%  | 13.29% | 9.20%  | 8.28%  | 6.79%  | 11.26% | 5.81%  | 6.36%  |
|                     | <i>N.tubulosa</i>          | 0.00%  | 0.00%  | 0.00%  | 0.00%  | 0.00%  | 0.00%  | 0.00%  | 0.00%  | 0.00%  | 0.00%  |
| <i>Lesquereusia</i> | <i>L.modesta</i>           | 0.00%  | 0.00%  | 0.00%  | 0.00%  | 0.00%  | 0.00%  | 0.00%  | 0.00%  | 0.00%  | 0.00%  |
| <i>Phryganella</i>  | <i>P.acropodia</i>         | 1.69%  | 13.83% | 4.62%  | 11.19% | 13.22% | 10.65% | 9.88%  | 11.92% | 11.63% | 6.36%  |
| <i>Physochila</i>   | <i>P.griseola</i>          | 0.00%  | 0.00%  | 0.00%  | 0.00%  | 0.00%  | 1.78%  | 0.00%  | 0.00%  | 0.00%  | 0.00%  |
| <i>Trigonopyxis</i> | <i>T.arcula</i>            | 0.00%  | 0.53%  | 0.00%  | 4.90%  | 2.30%  | 2.37%  | 0.00%  | 0.00%  | 2.33%  | 2.31%  |
| <i>Trinema</i>      | <i>T.complanatum</i>       | 1.69%  | 5.32%  | 0.00%  | 3.50%  | 6.90%  | 9.47%  | 4.94%  | 2.65%  | 3.49%  | 6.36%  |
|                     | <i>T.enchelys</i>          | 0.00%  | 1.60%  | 7.69%  | 0.00%  | 2.87%  | 3.55%  | 3.70%  | 5.96%  | 6.40%  | 2.31%  |
|                     | <i>T.lineare</i>           | 1.13%  | 1.06%  | 0.00%  | 0.00%  | 0.00%  | 0.00%  | 0.00%  | 1.99%  | 0.00%  | 3.47%  |

| Genus        | Species                    | 11     | 12     | 13     | 14     | 15     | 16     | 17     | 18     | 19     | 20     |
|--------------|----------------------------|--------|--------|--------|--------|--------|--------|--------|--------|--------|--------|
| Arcella      | <i>A.catinus</i>           | 0.98%  | 3.05%  | 1.18%  | 0.00%  | 0.00%  | 0.67%  | 0.00%  | 1.14%  | 0.00%  | 3.28%  |
|              | <i>A.vulgaris</i>          | 0.49%  | 0.00%  | 0.00%  | 0.00%  | 0.00%  | 0.00%  | 0.00%  | 0.00%  | 0.00%  | 0.55%  |
| Archerella   | <i>A.flavum</i>            | 0.49%  | 0.61%  | 0.59%  | 0.00%  | 1.18%  | 0.67%  | 0.55%  | 0.57%  | 0.00%  | 0.00%  |
| Argynnina    | <i>A.dentistoma</i>        | 0.00%  | 0.00%  | 0.00%  | 0.00%  | 0.00%  | 3.33%  | 0.00%  | 0.00%  | 0.00%  | 1.64%  |
| Assulina     | <i>A.muscorum</i>          | 12.75% | 12.80% | 11.83% | 7.30%  | 5.29%  | 8.67%  | 4.92%  | 6.86%  | 13.75% | 16.39% |
|              | <i>A.seminulum</i>         | 0.98%  | 3.66%  | 1.78%  | 1.12%  | 1.76%  | 0.67%  | 2.73%  | 3.43%  | 5.00%  | 0.55%  |
| Alabasta     | <i>A.militaris</i>         | 4.90%  | 2.44%  | 4.73%  | 1.69%  | 1.18%  | 7.33%  | 2.19%  | 3.43%  | 4.38%  | 3.28%  |
| Centropyxis  | <i>C.aculeata type</i>     | 0.00%  | 0.00%  | 1.18%  | 0.56%  | 1.18%  | 2.00%  | 1.64%  | 0.57%  | 1.25%  | 0.00%  |
|              | <i>C.aerophilatype</i>     | 3.92%  | 6.71%  | 1.18%  | 3.37%  | 7.06%  | 2.67%  | 7.65%  | 6.29%  | 3.75%  | 6.01%  |
|              | <i>C.platystomatatype</i>  | 3.92%  | 4.27%  | 2.96%  | 7.87%  | 16.47% | 11.33% | 14.21% | 13.71% | 10.63% | 1.64%  |
| Cyclopyxis   | <i>C.arcelloides</i>       | 1.96%  | 0.00%  | 1.18%  | 0.00%  | 2.94%  | 1.33%  | 2.73%  | 0.57%  | 1.88%  | 3.83%  |
|              | <i>C.Kahli</i>             | 0.00%  | 0.00%  | 0.00%  | 0.00%  | 0.00%  | 2.00%  | 0.00%  | 0.00%  | 0.00%  | 0.00%  |
| Corythion    | <i>C.dubium</i>            | 0.49%  | 1.22%  | 2.37%  | 0.00%  | 0.59%  | 0.67%  | 3.28%  | 1.14%  | 0.00%  | 0.00%  |
| Diffflugia   | <i>D.acuminata type</i>    | 0.00%  | 0.00%  | 0.00%  | 0.00%  | 0.00%  | 0.00%  | 0.55%  | 1.14%  | 1.25%  | 0.00%  |
|              | <i>D.lucida</i>            | 7.84%  | 7.93%  | 7.69%  | 9.55%  | 7.06%  | 9.33%  | 13.11% | 13.71% | 7.50%  | 6.01%  |
|              | <i>D.type A</i>            | 0.00%  | 1.83%  | 0.00%  | 0.56%  | 0.59%  | 1.33%  | 0.55%  | 1.14%  | 0.63%  | 0.00%  |
| Euglypha     | <i>E.cristata</i>          | 0.00%  | 0.00%  | 0.00%  | 0.00%  | 0.00%  | 0.00%  | 0.00%  | 0.00%  | 0.00%  | 0.00%  |
|              | <i>E.rotunda</i>           | 7.84%  | 4.88%  | 2.96%  | 11.80% | 2.94%  | 4.00%  | 6.01%  | 0.00%  | 3.75%  | 2.19%  |
|              | <i>E.strigosa</i>          | 0.00%  | 0.61%  | 0.59%  | 0.56%  | 0.00%  | 0.00%  | 0.00%  | 0.00%  | 0.00%  | 0.00%  |
|              | <i>E.tuberculata</i>       | 4.90%  | 0.00%  | 1.78%  | 1.69%  | 1.18%  | 0.67%  | 1.09%  | 1.71%  | 6.25%  | 6.56%  |
|              | <i>E.dentata</i>           | 0.00%  | 0.00%  | 0.00%  | 2.25%  | 2.94%  | 0.00%  | 1.09%  | 0.00%  | 0.00%  | 1.09%  |
| Heleopera    | <i>H.petricola/sphagni</i> | 1.47%  | 1.22%  | 3.55%  | 4.49%  | 2.35%  | 0.67%  | 1.64%  | 1.71%  | 3.13%  | 6.56%  |
|              | <i>H.rosea</i>             | 1.47%  | 0.00%  | 0.59%  | 0.00%  | 1.18%  | 0.00%  | 0.55%  | 0.57%  | 0.63%  | 0.55%  |
|              | <i>H.sylvatica</i>         | 0.00%  | 0.00%  | 0.00%  | 0.00%  | 0.00%  | 0.67%  | 0.00%  | 0.00%  | 0.00%  | 1.09%  |
| Hyalosphenia | <i>H.elegans</i>           | 5.88%  | 2.44%  | 6.51%  | 2.25%  | 2.94%  | 1.33%  | 1.64%  | 0.57%  | 1.25%  | 1.64%  |
|              | <i>H.minuta</i>            | 0.00%  | 0.00%  | 0.59%  | 1.69%  | 2.94%  | 2.00%  | 0.00%  | 0.00%  | 0.00%  | 0.55%  |
|              | <i>H.papilio</i>           | 15.20% | 10.98% | 7.69%  | 7.30%  | 7.06%  | 6.67%  | 3.83%  | 9.14%  | 3.13%  | 4.92%  |
|              | <i>H.spp</i>               | 0.00%  | 0.00%  | 0.00%  | 0.00%  | 0.00%  | 0.00%  | 0.00%  | 0.00%  | 0.00%  | 0.00%  |
| Nebela       | <i>N.collaris</i>          | 0.00%  | 0.00%  | 0.00%  | 0.00%  | 0.00%  | 0.00%  | 0.00%  | 0.00%  | 0.63%  | 0.55%  |
|              | <i>N.lageniformis</i>      | 2.94%  | 1.22%  | 2.96%  | 2.81%  | 0.59%  | 0.00%  | 3.28%  | 4.00%  | 6.25%  | 3.83%  |
|              | <i>N.penardiana</i>        | 0.00%  | 0.00%  | 0.00%  | 0.00%  | 0.00%  | 0.00%  | 0.00%  | 0.00%  | 0.00%  | 0.00%  |
|              | <i>N.tincta</i>            | 9.31%  | 8.54%  | 10.65% | 3.93%  | 5.88%  | 8.67%  | 3.28%  | 4.57%  | 7.50%  | 13.11% |
|              | <i>N.tubulosa</i>          | 0.49%  | 0.00%  | 0.00%  | 0.00%  | 0.00%  | 0.00%  | 0.55%  | 0.00%  | 0.00%  | 2.19%  |
| Lesquereusia | <i>L.modesta</i>           | 0.00%  | 0.00%  | 0.00%  | 0.00%  | 0.00%  | 0.00%  | 0.00%  | 0.00%  | 0.00%  | 0.00%  |
| Phryganella  | <i>P.acropodia</i>         | 3.92%  | 9.15%  | 7.10%  | 14.04% | 20.00% | 18.00% | 11.48% | 15.43% | 11.88% | 2.73%  |
| Physochila   | <i>P.griseola</i>          | 0.00%  | 0.00%  | 0.59%  | 0.00%  | 0.00%  | 0.67%  | 0.00%  | 0.00%  | 0.00%  | 0.00%  |
| Trigonopyxis | <i>T.arcula</i>            | 0.49%  | 0.61%  | 0.00%  | 1.12%  | 0.59%  | 2.67%  | 1.09%  | 3.43%  | 1.25%  | 4.37%  |
| Trinema      | <i>T.complanatum</i>       | 2.45%  | 9.15%  | 6.51%  | 5.62%  | 1.76%  | 0.00%  | 3.83%  | 0.57%  | 0.63%  | 1.64%  |
|              | <i>T.enchelys</i>          | 2.45%  | 6.10%  | 7.10%  | 5.06%  | 1.76%  | 1.33%  | 2.73%  | 3.43%  | 2.50%  | 2.73%  |
|              | <i>T.lineare</i>           | 1.96%  | 0.61%  | 2.96%  | 1.69%  | 0.59%  | 0.00%  | 2.73%  | 0.57%  | 0.63%  | 0.00%  |

  

| Genus       | Species                   | 21     | 22     | 23     | 24     | 25     | 26    | 27     | 28     | 29     | 30     |
|-------------|---------------------------|--------|--------|--------|--------|--------|-------|--------|--------|--------|--------|
| Arcella     | <i>A.catinus</i>          | 1.55%  | 0.00%  | 0.00%  | 0.00%  | 1.88%  | 0.49% | 0.00%  | 0.00%  | 0.00%  | 0.47%  |
|             | <i>A.vulgaris</i>         | 1.04%  | 0.00%  | 0.58%  | 0.00%  | 0.00%  | 0.00% | 0.00%  | 0.00%  | 0.98%  | 0.95%  |
| Archerella  | <i>A.flavum</i>           | 0.00%  | 0.00%  | 0.00%  | 0.00%  | 0.00%  | 0.00% | 0.00%  | 0.55%  | 0.00%  | 0.00%  |
| Argynnina   | <i>A.dentistoma</i>       | 2.59%  | 0.00%  | 0.58%  | 2.91%  | 5.63%  | 0.97% | 1.53%  | 4.42%  | 3.41%  | 2.84%  |
| Assulina    | <i>A.muscorum</i>         | 10.36% | 2.02%  | 10.53% | 13.37% | 13.13% | 9.71% | 17.86% | 12.15% | 11.71% | 13.74% |
|             | <i>A.seminulum</i>        | 0.00%  | 0.00%  | 0.00%  | 0.00%  | 1.88%  | 1.46% | 2.04%  | 0.55%  | 1.46%  | 2.37%  |
| Alabasta    | <i>A.militaris</i>        | 5.18%  | 2.02%  | 1.17%  | 3.49%  | 1.25%  | 5.34% | 2.04%  | 6.08%  | 2.44%  | 8.06%  |
| Centropyxis | <i>C.aculeata type</i>    | 2.07%  | 4.04%  | 2.34%  | 2.91%  | 2.50%  | 2.91% | 6.63%  | 0.55%  | 4.88%  | 1.90%  |
|             | <i>C.aerophilatype</i>    | 4.15%  | 7.07%  | 6.43%  | 6.40%  | 8.75%  | 8.74% | 5.61%  | 2.21%  | 6.34%  | 3.32%  |
|             | <i>C.platystomatatype</i> | 5.70%  | 10.10% | 5.85%  | 6.98%  | 11.25% | 7.28% | 3.06%  | 1.10%  | 6.83%  | 0.95%  |
| Cyclopyxis  | <i>C.arcelloides</i>      | 2.07%  | 2.02%  | 1.75%  | 0.00%  | 1.88%  | 0.97% | 1.02%  | 6.08%  | 0.98%  | 2.37%  |

|                     |                            |        |        |        |        |        |        |        |        |       |        |
|---------------------|----------------------------|--------|--------|--------|--------|--------|--------|--------|--------|-------|--------|
|                     | <i>C.Kahli</i>             | 0.00%  | 0.00%  | 0.00%  | 0.00%  | 0.00%  | 0.00%  | 0.00%  | 0.00%  | 0.00% | 0.00%  |
| <i>Corythion</i>    | <i>C.dubium</i>            | 2.07%  | 0.00%  | 1.17%  | 1.16%  | 0.63%  | 0.49%  | 2.04%  | 2.21%  | 1.46% | 0.95%  |
| <i>Diffflugia</i>   | <i>D.acuminata type</i>    | 0.00%  | 0.00%  | 0.00%  | 0.58%  | 0.00%  | 0.00%  | 0.00%  | 0.00%  | 0.98% | 1.90%  |
|                     | <i>D.lucida</i>            | 0.00%  | 8.08%  | 13.45% | 13.95% | 4.38%  | 7.28%  | 3.57%  | 2.76%  | 6.83% | 2.37%  |
|                     | <i>D.type A</i>            | 3.63%  | 2.02%  | 1.17%  | 1.74%  | 1.25%  | 0.00%  | 0.51%  | 0.00%  | 5.85% | 0.47%  |
| <i>Euglypha</i>     | <i>E.cristata</i>          | 0.00%  | 0.00%  | 1.17%  | 1.74%  | 1.25%  | 0.00%  | 1.02%  | 0.00%  | 0.00% | 0.00%  |
|                     | <i>E.rotunda</i>           | 5.70%  | 4.04%  | 15.79% | 0.00%  | 5.00%  | 1.46%  | 3.06%  | 1.66%  | 8.29% | 0.95%  |
|                     | <i>E.strigosa</i>          | 0.00%  | 0.00%  | 0.58%  | 0.00%  | 0.00%  | 0.00%  | 0.51%  | 0.00%  | 0.00% | 0.47%  |
|                     | <i>E.tuberculata</i>       | 4.66%  | 7.07%  | 3.51%  | 0.00%  | 3.75%  | 2.43%  | 3.57%  | 5.52%  | 5.85% | 5.69%  |
|                     | <i>E.dentata</i>           | 1.55%  | 4.04%  | 1.17%  | 1.74%  | 3.13%  | 0.00%  | 0.51%  | 0.00%  | 0.00% | 0.00%  |
| <i>Heleopera</i>    | <i>H.petricola/sphagni</i> | 6.22%  | 1.01%  | 2.92%  | 2.91%  | 3.75%  | 3.40%  | 3.06%  | 5.52%  | 2.44% | 5.69%  |
|                     | <i>H.rosea</i>             | 0.00%  | 1.01%  | 0.58%  | 2.91%  | 1.25%  | 1.46%  | 0.00%  | 0.00%  | 0.00% | 0.47%  |
|                     | <i>H.sylvatica</i>         | 0.00%  | 2.02%  | 0.00%  | 0.58%  | 0.00%  | 1.46%  | 0.51%  | 1.10%  | 0.00% | 0.47%  |
| <i>Hyalosphenia</i> | <i>H.elegans</i>           | 3.11%  | 0.00%  | 2.92%  | 2.91%  | 1.25%  | 4.37%  | 2.55%  | 3.87%  | 2.93% | 3.79%  |
|                     | <i>H.minuta</i>            | 0.00%  | 0.00%  | 0.00%  | 0.00%  | 0.00%  | 0.49%  | 0.00%  | 0.00%  | 0.00% | 0.00%  |
|                     | <i>H.papilio</i>           | 4.15%  | 10.10% | 2.92%  | 2.33%  | 3.75%  | 11.17% | 18.88% | 20.99% | 8.29% | 13.27% |
|                     | <i>H.spp</i>               | 2.07%  | 0.00%  | 0.58%  | 0.00%  | 0.63%  | 0.00%  | 0.00%  | 0.00%  | 0.00% | 0.00%  |
| <i>Nebela</i>       | <i>N.collaris</i>          | 0.00%  | 0.00%  | 1.75%  | 0.00%  | 0.00%  | 0.49%  | 0.00%  | 0.00%  | 0.49% | 0.00%  |
|                     | <i>N.lageniformis</i>      | 6.74%  | 0.00%  | 2.92%  | 0.00%  | 1.88%  | 0.97%  | 1.53%  | 0.55%  | 3.90% | 2.37%  |
|                     | <i>N.penardiana</i>        | 0.00%  | 0.00%  | 1.17%  | 1.16%  | 0.00%  | 0.00%  | 0.00%  | 0.55%  | 0.00% | 0.00%  |
|                     | <i>N.tincta</i>            | 6.74%  | 10.10% | 1.17%  | 6.98%  | 4.38%  | 13.11% | 11.73% | 14.36% | 5.85% | 18.48% |
|                     | <i>N.tubulosa</i>          | 0.00%  | 8.08%  | 2.34%  | 1.16%  | 0.00%  | 0.49%  | 0.00%  | 0.55%  | 0.98% | 0.00%  |
| <i>Lesquereusia</i> | <i>L.modesta</i>           | 0.00%  | 0.00%  | 0.00%  | 0.00%  | 0.00%  | 0.00%  | 0.00%  | 0.00%  | 0.00% | 0.00%  |
| <i>Phryganella</i>  | <i>P.acropodia</i>         | 10.88% | 12.12% | 9.94%  | 11.63% | 10.00% | 6.80%  | 4.08%  | 2.76%  | 5.37% | 1.42%  |
| <i>Physochila</i>   | <i>P.griseola</i>          | 0.00%  | 0.00%  | 0.00%  | 0.00%  | 0.00%  | 0.00%  | 0.00%  | 0.00%  | 0.00% | 0.00%  |
| <i>Trigonopyxis</i> | <i>T.arcula</i>            | 0.00%  | 0.00%  | 1.17%  | 0.58%  | 1.88%  | 4.85%  | 0.00%  | 0.55%  | 0.00% | 1.42%  |
| <i>Trinema</i>      | <i>T.complanatum</i>       | 0.00%  | 0.00%  | 0.00%  | 1.74%  | 0.00%  | 0.00%  | 0.00%  | 0.00%  | 0.00% | 0.47%  |
|                     | <i>T.enchelys</i>          | 4.66%  | 0.00%  | 0.58%  | 1.74%  | 0.63%  | 0.49%  | 1.02%  | 1.10%  | 0.00% | 0.95%  |
|                     | <i>T.lineare</i>           | 0.00%  | 1.01%  | 1.17%  | 2.33%  | 0.63%  | 0.00%  | 1.53%  | 1.66%  | 0.98% | 0.47%  |

  

| Genus              | Species                    | 31     | 32    | 33     | 34    | 35     | 36     | 37    | 38     | 39     | 40     |
|--------------------|----------------------------|--------|-------|--------|-------|--------|--------|-------|--------|--------|--------|
| <i>Arcella</i>     | <i>A.catinus</i>           | 2.29%  | 1.65% | 0.00%  | 1.72% | 1.05%  | 2.39%  | 1.16% | 2.82%  | 2.48%  | 1.36%  |
|                    | <i>A.vulgaris</i>          | 0.00%  | 0.00% | 0.00%  | 1.15% | 2.11%  | 1.44%  | 1.16% | 0.56%  | 0.00%  | 0.00%  |
| <i>Archerella</i>  | <i>A.flavum</i>            | 0.00%  | 0.00% | 0.58%  | 0.57% | 0.00%  | 0.00%  | 0.00% | 0.00%  | 0.00%  | 0.00%  |
| <i>Argynnia</i>    | <i>A.dentistoma</i>        | 2.86%  | 3.30% | 1.16%  | 3.45% | 5.79%  | 2.39%  | 4.62% | 3.39%  | 3.11%  | 5.91%  |
| <i>Assulina</i>    | <i>A.muscorum</i>          | 10.86% | 4.40% | 5.81%  | 8.62% | 10.53% | 18.66% | 6.36% | 12.43% | 11.18% | 17.27% |
|                    | <i>A.seminulum</i>         | 1.14%  | 4.40% | 0.00%  | 1.72% | 2.11%  | 2.39%  | 0.00% | 3.95%  | 0.62%  | 1.82%  |
| <i>Alabasta</i>    | <i>A.militaris</i>         | 5.71%  | 3.30% | 0.58%  | 4.02% | 2.11%  | 2.87%  | 0.58% | 5.08%  | 3.11%  | 0.91%  |
| <i>Centropyxis</i> | <i>C.aculeata type</i>     | 2.86%  | 3.30% | 5.81%  | 7.47% | 2.63%  | 3.83%  | 2.89% | 1.13%  | 0.62%  | 0.91%  |
|                    | <i>C.aerophilatype</i>     | 2.86%  | 7.69% | 13.95% | 8.62% | 1.58%  | 1.91%  | 5.78% | 0.56%  | 5.59%  | 1.82%  |
|                    | <i>C.platystomatatype</i>  | 1.71%  | 4.95% | 28.49% | 5.17% | 3.68%  | 1.44%  | 7.51% | 2.26%  | 1.24%  | 2.27%  |
| <i>Cyclopyxis</i>  | <i>C.arcelloides</i>       | 0.00%  | 3.30% | 0.00%  | 2.30% | 5.26%  | 5.26%  | 9.83% | 4.52%  | 1.86%  | 1.82%  |
|                    | <i>C.Kahli</i>             | 0.00%  | 0.55% | 0.00%  | 0.00% | 0.00%  | 0.00%  | 2.89% | 0.00%  | 0.00%  | 0.00%  |
| <i>Corythion</i>   | <i>C.dubium</i>            | 2.29%  | 2.20% | 1.16%  | 1.15% | 1.05%  | 1.44%  | 1.73% | 1.13%  | 2.48%  | 0.00%  |
| <i>Diffflugia</i>  | <i>D.acuminata type</i>    | 0.57%  | 0.00% | 0.00%  | 0.00% | 0.00%  | 0.00%  | 0.00% | 0.00%  | 0.00%  | 0.00%  |
|                    | <i>D.lucida</i>            | 3.43%  | 5.49% | 12.79% | 4.60% | 2.63%  | 1.91%  | 1.16% | 1.69%  | 6.21%  | 1.36%  |
|                    | <i>D.type A</i>            | 1.71%  | 0.00% | 0.00%  | 0.57% | 2.63%  | 0.00%  | 0.00% | 0.56%  | 0.00%  | 0.00%  |
| <i>Euglypha</i>    | <i>E.cristata</i>          | 0.57%  | 2.20% | 0.00%  | 0.00% | 0.00%  | 0.00%  | 0.00% | 0.00%  | 0.00%  | 0.00%  |
|                    | <i>E.rotunda</i>           | 5.14%  | 2.75% | 6.98%  | 0.00% | 1.58%  | 0.00%  | 1.16% | 1.13%  | 1.24%  | 1.82%  |
|                    | <i>E.strigosa</i>          | 0.00%  | 0.00% | 0.00%  | 0.00% | 0.53%  | 0.96%  | 0.00% | 0.00%  | 0.00%  | 0.00%  |
|                    | <i>E.tuberculata</i>       | 7.43%  | 0.55% | 2.33%  | 4.60% | 4.21%  | 5.74%  | 7.51% | 13.56% | 3.73%  | 7.73%  |
|                    | <i>E.dentata</i>           | 0.00%  | 1.10% | 2.33%  | 2.30% | 0.00%  | 0.00%  | 0.58% | 0.56%  | 2.48%  | 0.91%  |
| <i>Heleopera</i>   | <i>H.petricola/sphagni</i> | 3.43%  | 0.00% | 1.74%  | 0.00% | 4.74%  | 2.87%  | 6.36% | 1.13%  | 3.11%  | 5.00%  |
|                    | <i>H.rosea</i>             | 1.14%  | 2.20% | 0.00%  | 2.30% | 0.00%  | 2.39%  | 2.89% | 0.56%  | 4.97%  | 1.82%  |

|                     |                       |        |        |       |        |        |        |        |        |        |        |
|---------------------|-----------------------|--------|--------|-------|--------|--------|--------|--------|--------|--------|--------|
|                     | <i>H.sylvatica</i>    | 1.71%  | 0.00%  | 0.00% | 0.57%  | 0.53%  | 0.48%  | 1.73%  | 1.69%  | 1.86%  | 0.91%  |
| <i>Hyalosphenia</i> | <i>H.elegans</i>      | 8.57%  | 2.20%  | 1.74% | 4.02%  | 3.16%  | 4.31%  | 0.58%  | 3.39%  | 3.11%  | 3.18%  |
|                     | <i>H.minuta</i>       | 0.57%  | 0.55%  | 0.00% | 1.15%  | 0.00%  | 0.00%  | 0.00%  | 0.00%  | 0.00%  | 0.00%  |
|                     | <i>H.papilio</i>      | 14.86% | 10.44% | 3.49% | 13.79% | 20.53% | 21.05% | 17.92% | 20.90% | 21.12% | 18.64% |
|                     | <i>H.spp</i>          | 0.57%  | 0.00%  | 2.33% | 0.00%  | 0.00%  | 0.00%  | 0.00%  | 0.00%  | 0.00%  | 0.00%  |
|                     | <i>N.collaris</i>     | 2.86%  | 0.00%  | 0.00% | 0.00%  | 0.00%  | 0.48%  | 0.00%  | 0.00%  | 0.00%  | 1.36%  |
| <i>Nebela</i>       | <i>N.lageniformis</i> | 4.00%  | 2.20%  | 0.58% | 1.15%  | 4.21%  | 0.48%  | 1.73%  | 1.13%  | 1.24%  | 0.45%  |
|                     | <i>N.penardiana</i>   | 1.14%  | 0.55%  | 0.00% | 0.00%  | 0.00%  | 0.00%  | 0.00%  | 0.00%  | 0.00%  | 0.00%  |
|                     | <i>N.tincta</i>       | 3.43%  | 20.88% | 0.58% | 10.92% | 8.95%  | 10.05% | 10.40% | 11.30% | 11.18% | 20.00% |
|                     | <i>N.tubulosa</i>     | 0.00%  | 3.30%  | 0.00% | 0.00%  | 1.58%  | 0.96%  | 0.00%  | 0.00%  | 0.00%  | 0.45%  |
| <i>Lesquereusia</i> | <i>L.modesta</i>      | 0.00%  | 0.00%  | 0.00% | 0.00%  | 0.00%  | 0.00%  | 0.00%  | 0.00%  | 0.00%  | 0.00%  |
| <i>Phryganella</i>  | <i>P.acropodia</i>    | 0.57%  | 3.85%  | 2.91% | 5.17%  | 3.16%  | 1.44%  | 0.58%  | 1.13%  | 3.11%  | 0.91%  |
| <i>Physochila</i>   | <i>P.griseola</i>     | 2.29%  | 0.00%  | 0.58% | 0.57%  | 0.53%  | 0.00%  | 0.00%  | 0.00%  | 1.24%  | 0.00%  |
| <i>Trigonopyxis</i> | <i>T.arcula</i>       | 0.57%  | 0.00%  | 1.74% | 1.72%  | 1.58%  | 0.96%  | 1.73%  | 2.26%  | 1.86%  | 0.00%  |
| <i>Trinema</i>      | <i>T.complanatum</i>  | 0.57%  | 0.55%  | 0.00% | 0.00%  | 0.53%  | 0.48%  | 0.00%  | 0.00%  | 0.62%  | 0.00%  |
|                     | <i>T.enchelys</i>     | 1.14%  | 0.00%  | 0.58% | 0.00%  | 0.53%  | 0.00%  | 0.00%  | 0.00%  | 0.62%  | 0.91%  |
|                     | <i>T.lineare</i>      | 0.57%  | 0.55%  | 0.58% | 0.57%  | 0.53%  | 0.48%  | 0.00%  | 0.00%  | 0.00%  | 0.00%  |

  

| Genus               | Species                    | 41     | 42     | 43     | 44     | 45     | 46     | 47     | 48     | 49     | 50     |
|---------------------|----------------------------|--------|--------|--------|--------|--------|--------|--------|--------|--------|--------|
| <i>Arcella</i>      | <i>A.catinus</i>           | 1.23%  | 1.74%  | 1.53%  | 0.00%  | 0.98%  | 4.15%  | 1.80%  | 1.05%  | 0.00%  | 0.61%  |
|                     | <i>A.vulgaris</i>          | 0.00%  | 0.00%  | 0.00%  | 0.48%  | 0.00%  | 0.46%  | 0.00%  | 0.00%  | 0.56%  | 1.21%  |
| <i>Archerella</i>   | <i>A.flavum</i>            | 0.00%  | 0.00%  | 0.51%  | 0.00%  | 0.00%  | 0.00%  | 0.60%  | 0.00%  | 2.25%  | 1.21%  |
| <i>Argynnina</i>    | <i>A.dentistoma</i>        | 3.70%  | 2.33%  | 4.08%  | 2.42%  | 0.00%  | 3.23%  | 0.00%  | 2.11%  | 0.00%  | 1.21%  |
| <i>Assulina</i>     | <i>A.muscorum</i>          | 9.88%  | 11.05% | 12.24% | 22.71% | 13.17% | 10.60% | 21.56% | 10.00% | 12.36% | 26.06% |
|                     | <i>A.seminulum</i>         | 0.62%  | 1.16%  | 0.00%  | 0.97%  | 0.49%  | 0.00%  | 1.20%  | 0.00%  | 0.00%  | 1.21%  |
| <i>Alabasta</i>     | <i>A.militaris</i>         | 5.56%  | 6.98%  | 3.06%  | 6.76%  | 4.88%  | 5.99%  | 2.99%  | 4.74%  | 3.37%  | 6.67%  |
| <i>Centropyxis</i>  | <i>C.aculeata type</i>     | 3.09%  | 4.07%  | 1.53%  | 2.42%  | 2.93%  | 2.76%  | 1.80%  | 3.68%  | 1.12%  | 1.21%  |
|                     | <i>C.aerophilatype</i>     | 9.88%  | 1.74%  | 2.55%  | 0.48%  | 2.93%  | 4.15%  | 5.39%  | 5.79%  | 7.87%  | 5.45%  |
|                     | <i>C.platystomatatype</i>  | 6.17%  | 2.33%  | 3.06%  | 1.45%  | 7.32%  | 11.06% | 3.59%  | 10.53% | 7.87%  | 3.64%  |
| <i>Cyclopyxis</i>   | <i>C.carcelloides</i>      | 1.23%  | 1.74%  | 1.02%  | 5.31%  | 3.41%  | 2.76%  | 6.59%  | 1.05%  | 4.49%  | 0.00%  |
|                     | <i>C.Kahli</i>             | 0.00%  | 0.00%  | 0.51%  | 0.00%  | 1.46%  | 1.38%  | 1.20%  | 0.00%  | 0.56%  | 0.61%  |
| <i>Corythion</i>    | <i>C.dubium</i>            | 3.09%  | 0.58%  | 0.51%  | 0.48%  | 3.41%  | 1.84%  | 0.60%  | 1.58%  | 0.00%  | 0.61%  |
| <i>Diffugia</i>     | <i>D.acuminata type</i>    | 0.00%  | 0.00%  | 0.00%  | 0.00%  | 0.00%  | 0.00%  | 0.00%  | 0.00%  | 0.00%  | 0.00%  |
|                     | <i>D.lucida</i>            | 12.35% | 8.14%  | 4.59%  | 3.86%  | 4.88%  | 7.37%  | 2.40%  | 6.84%  | 6.18%  | 3.03%  |
|                     | <i>D.type A</i>            | 1.85%  | 0.00%  | 0.00%  | 0.97%  | 0.49%  | 0.00%  | 0.60%  | 2.11%  | 0.00%  | 0.00%  |
| <i>Euglypha</i>     | <i>E.cristata</i>          | 0.00%  | 0.00%  | 0.00%  | 0.00%  | 0.49%  | 0.00%  | 0.00%  | 0.00%  | 0.00%  | 0.00%  |
|                     | <i>E.rotunda</i>           | 2.47%  | 3.49%  | 3.06%  | 0.48%  | 0.98%  | 0.92%  | 0.60%  | 3.68%  | 0.00%  | 0.61%  |
|                     | <i>E.strigosa</i>          | 0.00%  | 0.00%  | 0.00%  | 0.00%  | 0.00%  | 0.46%  | 0.00%  | 0.00%  | 0.00%  | 0.00%  |
|                     | <i>E.tuberculata</i>       | 0.62%  | 5.23%  | 2.55%  | 3.38%  | 0.49%  | 1.38%  | 0.60%  | 2.63%  | 0.56%  | 0.00%  |
|                     | <i>E.dentata</i>           | 0.00%  | 0.58%  | 1.02%  | 0.48%  | 0.98%  | 0.00%  | 0.00%  | 0.00%  | 0.00%  | 0.61%  |
| <i>Heleopera</i>    | <i>H.petricola/sphagni</i> | 4.94%  | 5.23%  | 4.59%  | 1.45%  | 0.98%  | 3.23%  | 6.59%  | 2.63%  | 5.62%  | 2.42%  |
|                     | <i>H.rosea</i>             | 0.62%  | 2.33%  | 0.51%  | 0.48%  | 1.95%  | 0.46%  | 1.80%  | 2.63%  | 3.37%  | 1.21%  |
|                     | <i>H.sylvatica</i>         | 0.62%  | 0.00%  | 0.51%  | 0.97%  | 1.46%  | 0.46%  | 0.60%  | 0.00%  | 0.00%  | 0.00%  |
| <i>Hyalosphenia</i> | <i>H.elegans</i>           | 1.85%  | 1.74%  | 2.55%  | 0.97%  | 2.44%  | 0.92%  | 2.40%  | 0.53%  | 0.00%  | 0.00%  |
|                     | <i>H.minuta</i>            | 0.00%  | 0.00%  | 0.51%  | 0.00%  | 15.12% | 0.00%  | 0.00%  | 0.00%  | 0.00%  | 0.00%  |
|                     | <i>H.papilio</i>           | 8.02%  | 11.63% | 14.29% | 12.08% | 0.00%  | 5.53%  | 1.80%  | 8.42%  | 12.92% | 10.30% |
|                     | <i>H.spp</i>               | 0.00%  | 0.58%  | 0.00%  | 0.00%  | 0.00%  | 0.00%  | 0.00%  | 0.00%  | 0.00%  | 0.00%  |
| <i>Nebela</i>       | <i>N.collaris</i>          | 0.62%  | 2.33%  | 0.51%  | 0.00%  | 0.00%  | 0.00%  | 0.00%  | 0.00%  | 0.00%  | 0.00%  |
|                     | <i>N.lageniformis</i>      | 1.23%  | 0.00%  | 2.04%  | 0.97%  | 0.00%  | 3.23%  | 2.40%  | 2.63%  | 0.00%  | 0.00%  |
|                     | <i>N.penardiana</i>        | 0.00%  | 0.00%  | 0.00%  | 0.00%  | 0.00%  | 0.00%  | 0.00%  | 0.53%  | 0.00%  | 0.00%  |
|                     | <i>N.tincta</i>            | 0.62%  | 18.02% | 19.39% | 16.43% | 5.37%  | 7.83%  | 12.57% | 3.16%  | 11.24% | 10.30% |
|                     | <i>N.tubulosa</i>          | 0.00%  | 0.00%  | 0.00%  | 0.00%  | 0.00%  | 0.00%  | 0.00%  | 0.53%  | 0.56%  | 0.00%  |
| <i>Lesquereusia</i> | <i>L.modesta</i>           | 16.05% | 0.00%  | 0.00%  | 0.00%  | 0.00%  | 0.00%  | 0.00%  | 0.00%  | 0.00%  | 0.00%  |
| <i>Phryganella</i>  | <i>P.acropodia</i>         | 0.00%  | 5.23%  | 7.65%  | 10.63% | 18.05% | 9.22%  | 12.57% | 15.79% | 8.43%  | 10.91% |

|                     |                      |       |       |       |       |       |       |       |       |       |       |
|---------------------|----------------------|-------|-------|-------|-------|-------|-------|-------|-------|-------|-------|
| <i>Physochila</i>   | <i>P.griseola</i>    | 0.00% | 0.58% | 1.02% | 0.00% | 2.93% | 5.07% | 4.79% | 5.79% | 2.81% | 3.64% |
| <i>Trigonopyxis</i> | <i>T.arcula</i>      | 3.70% | 0.58% | 1.53% | 1.45% | 0.98% | 0.46% | 1.20% | 0.00% | 5.62% | 4.85% |
| <i>Trinema</i>      | <i>T.complanatum</i> | 0.00% | 0.00% | 0.51% | 0.48% | 0.00% | 0.00% | 0.00% | 0.00% | 0.00% | 0.61% |
|                     | <i>T.enchelys</i>    | 0.00% | 0.00% | 0.51% | 0.97% | 0.49% | 0.46% | 0.00% | 0.00% | 0.00% | 0.00% |
|                     | <i>T.lineare</i>     | 0.00% | 0.00% | 0.00% | 0.00% | 0.49% | 0.46% | 0.00% | 0.00% | 0.00% | 0.00% |

| Genus               | Species                    | 51     | 52     | 53     | 54     | 55     | 56     | 57     | 58     | 59     | 60     |
|---------------------|----------------------------|--------|--------|--------|--------|--------|--------|--------|--------|--------|--------|
| <i>Arcella</i>      | <i>A.catinus</i>           | 1.16%  | 0.00%  | 1.12%  | 1.09%  | 1.14%  | 0.59%  | 1.88%  | 0.00%  | 0.68%  | 1.09%  |
|                     | <i>A.vulgaris</i>          | 1.73%  | 1.72%  | 1.12%  | 0.00%  | 2.29%  | 0.59%  | 2.50%  | 0.58%  | 0.68%  | 0.00%  |
| <i>Archerella</i>   | <i>A.flavum</i>            | 1.16%  | 0.57%  | 0.56%  | 3.83%  | 0.00%  | 0.59%  | 1.88%  | 2.31%  | 1.36%  | 5.43%  |
| <i>Argynnina</i>    | <i>A.dentistoma</i>        | 0.00%  | 0.57%  | 0.00%  | 0.55%  | 0.00%  | 0.59%  | 0.00%  | 0.00%  | 0.00%  | 0.00%  |
| <i>Assulina</i>     | <i>A.muscorum</i>          | 15.03% | 5.17%  | 15.08% | 13.11% | 7.43%  | 18.82% | 10.00% | 22.54% | 15.65% | 21.74% |
|                     | <i>A.seminulum</i>         | 1.16%  | 3.45%  | 1.68%  | 2.73%  | 6.29%  | 3.53%  | 3.75%  | 2.89%  | 2.04%  | 4.89%  |
| <i>Alabasta</i>     | <i>A.militaris</i>         | 4.05%  | 0.57%  | 3.91%  | 3.83%  | 1.71%  | 2.94%  | 1.25%  | 5.20%  | 0.68%  | 4.35%  |
| <i>Centropyxis</i>  | <i>C.aculeata type</i>     | 1.73%  | 2.87%  | 0.56%  | 2.19%  | 1.14%  | 1.18%  | 0.00%  | 3.47%  | 4.08%  | 1.09%  |
|                     | <i>C.aerophilatype</i>     | 12.72% | 4.60%  | 13.97% | 3.83%  | 4.00%  | 11.18% | 4.38%  | 5.20%  | 10.20% | 10.87% |
|                     | <i>C.platystomatatype</i>  | 2.31%  | 0.57%  | 2.79%  | 1.64%  | 2.29%  | 4.12%  | 1.25%  | 4.62%  | 3.40%  | 3.26%  |
| <i>Cyclopyxis</i>   | <i>C.arcelloides</i>       | 2.89%  | 6.32%  | 6.70%  | 3.83%  | 4.57%  | 7.65%  | 4.38%  | 4.05%  | 10.88% | 2.17%  |
|                     | <i>C.Kahli</i>             | 0.58%  | 1.15%  | 0.56%  | 1.09%  | 0.57%  | 1.18%  | 0.00%  | 0.00%  | 0.68%  | 0.00%  |
| <i>Corythion</i>    | <i>C.dubium</i>            | 0.58%  | 0.00%  | 0.56%  | 0.00%  | 0.00%  | 0.00%  | 0.00%  | 0.58%  | 0.00%  | 1.09%  |
| <i>Diffflugia</i>   | <i>D.acuminata type</i>    | 0.00%  | 0.00%  | 0.00%  | 0.00%  | 0.00%  | 0.00%  | 0.00%  | 0.00%  | 0.00%  | 0.00%  |
|                     | <i>D.lucida</i>            | 5.20%  | 1.72%  | 4.47%  | 2.73%  | 2.29%  | 0.00%  | 3.75%  | 5.20%  | 4.08%  | 2.72%  |
|                     | <i>D.type A</i>            | 0.00%  | 0.00%  | 1.68%  | 0.00%  | 0.00%  | 0.00%  | 0.63%  | 0.58%  | 0.00%  | 0.54%  |
| <i>Euglypha</i>     | <i>E.cristata</i>          | 0.00%  | 0.00%  | 0.00%  | 0.00%  | 0.00%  | 0.00%  | 0.00%  | 0.00%  | 0.00%  | 0.00%  |
|                     | <i>E.rotunda</i>           | 2.31%  | 0.00%  | 0.56%  | 0.00%  | 0.57%  | 0.00%  | 0.00%  | 0.58%  | 0.00%  | 0.54%  |
|                     | <i>E.strigosa</i>          | 0.00%  | 0.57%  | 0.00%  | 0.00%  | 0.00%  | 0.00%  | 0.00%  | 0.00%  | 0.00%  | 0.00%  |
|                     | <i>E.tuberculata</i>       | 1.73%  | 2.30%  | 0.00%  | 1.64%  | 4.57%  | 3.53%  | 0.63%  | 3.47%  | 0.68%  | 0.54%  |
|                     | <i>E.dentata</i>           | 0.00%  | 0.00%  | 0.56%  | 0.00%  | 0.00%  | 0.00%  | 0.00%  | 0.58%  | 0.00%  | 0.54%  |
| <i>Heleopera</i>    | <i>H.petricola/sphagni</i> | 2.89%  | 3.45%  | 1.12%  | 3.83%  | 5.14%  | 0.00%  | 7.50%  | 2.89%  | 2.04%  | 0.00%  |
|                     | <i>H.rosea</i>             | 3.47%  | 5.17%  | 1.68%  | 0.55%  | 0.57%  | 0.00%  | 1.88%  | 0.58%  | 6.12%  | 0.54%  |
|                     | <i>H.sylvatica</i>         | 1.16%  | 1.15%  | 0.00%  | 0.55%  | 0.57%  | 0.00%  | 0.63%  | 1.73%  | 0.68%  | 1.09%  |
| <i>Hyalosphenia</i> | <i>H.elegans</i>           | 0.58%  | 2.87%  | 0.00%  | 2.73%  | 0.00%  | 1.18%  | 0.00%  | 1.73%  | 2.72%  | 0.54%  |
|                     | <i>H.minuta</i>            | 0.00%  | 0.00%  | 0.00%  | 0.00%  | 0.00%  | 0.00%  | 0.63%  | 0.00%  | 0.00%  | 0.00%  |
|                     | <i>H.papilio</i>           | 5.78%  | 12.07% | 3.91%  | 9.84%  | 12.00% | 1.76%  | 22.50% | 4.62%  | 2.72%  | 13.04% |
|                     | <i>H.spp</i>               | 2.89%  | 1.72%  | 0.00%  | 3.83%  | 0.57%  | 1.18%  | 3.13%  | 1.73%  | 0.68%  | 0.54%  |
| <i>Nebela</i>       | <i>N.collaris</i>          | 0.00%  | 0.57%  | 0.56%  | 0.00%  | 0.00%  | 0.00%  | 0.63%  | 0.00%  | 0.00%  | 0.00%  |
|                     | <i>N.lageniformis</i>      | 1.73%  | 3.45%  | 4.47%  | 3.83%  | 2.29%  | 0.59%  | 0.63%  | 1.16%  | 0.68%  | 2.17%  |
|                     | <i>N.penardiana</i>        | 0.00%  | 0.00%  | 0.00%  | 0.00%  | 0.00%  | 0.59%  | 0.00%  | 0.00%  | 0.00%  | 0.00%  |
|                     | <i>N.tincta</i>            | 8.09%  | 12.64% | 11.73% | 10.93% | 4.00%  | 0.00%  | 5.63%  | 4.05%  | 14.29% | 6.52%  |
|                     | <i>N.tubulosa</i>          | 0.00%  | 0.57%  | 0.00%  | 1.09%  | 0.00%  | 1.18%  | 0.00%  | 0.00%  | 0.68%  | 0.00%  |
| <i>Lesquereusia</i> | <i>L.modesta</i>           | 0.00%  | 0.00%  | 0.00%  | 0.00%  | 0.00%  | 0.00%  | 0.00%  | 0.00%  | 0.00%  | 0.00%  |
| <i>Phryganella</i>  | <i>P.acropodia</i>         | 6.36%  | 5.17%  | 11.73% | 8.20%  | 10.29% | 23.53% | 5.63%  | 10.98% | 4.08%  | 9.24%  |
| <i>Physochila</i>   | <i>P.griseola</i>          | 4.05%  | 1.15%  | 0.56%  | 0.00%  | 1.14%  | 2.35%  | 2.50%  | 2.89%  | 2.72%  | 2.17%  |
| <i>Trigonopyxis</i> | <i>T.arcula</i>            | 6.94%  | 16.67% | 7.26%  | 10.93% | 21.14% | 10.59% | 8.75%  | 5.20%  | 6.80%  | 2.72%  |
| <i>Trinema</i>      | <i>T.complanatum</i>       | 0.00%  | 0.00%  | 0.00%  | 0.00%  | 0.00%  | 0.00%  | 0.00%  | 0.00%  | 0.00%  | 0.00%  |
|                     | <i>T.enchelys</i>          | 0.00%  | 0.00%  | 0.00%  | 0.00%  | 0.00%  | 0.00%  | 0.00%  | 0.00%  | 0.00%  | 0.00%  |
|                     | <i>T.lineare</i>           | 0.00%  | 0.57%  | 0.00%  | 0.00%  | 0.57%  | 0.00%  | 0.00%  | 0.00%  | 0.00%  | 0.00%  |
